# Supplementary material for: Functional Assessment of 2,177 U.S. and International Drugs Identifies the Quinoline Nitroxoline as a Potent Amoebicidal Agent against the Pathogen Balamuthia mandrillaris
Source: PubMed Central journal article supplement (PMC6212833; doi:10.1128/mbio.02051-18), 2018-10-30
Supplement: mbo005184140st2.pdf [file mbo005184140st2.pdf]

**Table S2**

| Compound name                              | Compound number | Structure                                                                           | IC <sub>50</sub> (μM) | R <sup>2</sup> | Hill slope | Compound source  |
|--------------------------------------------|-----------------|-------------------------------------------------------------------------------------|-----------------------|----------------|------------|------------------|
| 8-Hydroxy-5-nitroquinoline                 | <b>1</b>        | 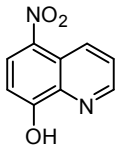   | 4.77                  | 0.980          | 3.49       | Selleck Chemical |
| 8-Hydroxyquinoline                         | <b>2</b>        |    | 30.51                 | 0.929          | 1.27       | Sigma-Aldrich    |
| 5-Nitroquinoline                           | <b>3</b>        |    | 82.69                 | 0.888          | 0.93       | Sigma-Aldrich    |
| 5-Fluoroquinolin-8-ol                      | <b>4</b>        |    | 60.41                 | 0.953          | 4.92       | MolPort          |
| 5-Chloro-8-quinolinol                      | <b>5</b>        |   | 28.69                 | 0.968          | 16.11      | Sigma-Aldrich    |
| 5-Bromo-8-hydroxyquinoline                 | <b>6</b>        |  | 48.94                 | 0.991          | 3.35       | AK Scientific    |
| 5-Methylquinolin-8-ol                      | <b>7</b>        |  | 19.94                 | 0.984          | 3.57       | AK Scientific    |
| 5-Amino-8-hydroxyquinoline dihydrochloride | <b>8</b>        |  | 37.55                 | 0.664          | 0.82       | Sigma-Aldrich    |
| 5-Nitroso-8-hydroxyquinoline               | <b>9</b>        |  | 48.95                 | 0.986          | 4.14       | AK Scientific    |
| 5,7-Dichloro-8-quinolinol                  | <b>10</b>       |  | 50.03                 | 0.948          | 3.69       | Sigma-Aldrich    |

**Table S2 (continued)**

| Compound name                      | Compound number | Structure                                                                           | IC <sub>50</sub> (μM) | R <sup>2</sup> | Hill slope | Compound source |
|------------------------------------|-----------------|-------------------------------------------------------------------------------------|-----------------------|----------------|------------|-----------------|
| 5,7-Dinitro-8-quinolinol           | 11              | 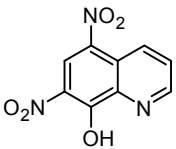   | 58.89                 | 0.903          | 4.49       | Sigma-Aldrich   |
| 8-Hydroxy-6-nitroquinoline         | 12              |    | 16.80                 | 0.894          | 3.82       | MolPort         |
| 8-Hydroxy-5-quinolinesulfonic acid | 13              |    | 338.3                 | 0.769          | 1.21       | Sigma-Aldrich   |
| 1,10-Phenanthroline                | 14              |    | 15.89                 | 0.967          | 3.71       | Sigma-Aldrich   |
| 6-Nitroquinolone                   | 15              |    | 189.4                 | 0.808          | 1.41       | Sigma-Aldrich   |
| 8-Quinolinol N-oxide               | 16              |  | 165.0                 | 0.756          | 1.64       | Sigma-Aldrich   |
| 8-Ethoxy-5-nitroquinoline          | 17              |  | 434.2                 | 0.709          | 1.37       | Sigma-Aldrich   |
| 2-Quinolinecarboxylic acid         | 18              |  | 884.2                 | 0.266          | 1.28       | Sigma-Aldrich   |
| 3-Nitro-4-quinolinol               | 19              |  | 1324                  | 0.315          | 1.07       | Sigma-Aldrich   |
| Quinoline                          | 20              |  | Not converged         |                |            | Sigma-Aldrich   |

**Table S2.** Structures, IC<sub>50</sub> values, and dose-response curve fitting parameters for nitroxoline and all nitroxoline analogs tested for activity against *B. mandrillaris*. IC<sub>50</sub>, R<sup>2</sup>, and Hill slope values were calculated based on sigmoidal curves fit to 8-point dose-response experiments performed in triplicate. Compounds 2, 4-12, and 14 were the most potent inhibitors of *B. mandrillaris*, most likely due to the presence of an 8-position hydroxyl group or bidentate ligand on the quinoline ring, which are predicted to be necessary for metal binding activity.
