# Supplementary material for: Functional Assessment of 2,177 U.S. and International Drugs Identifies the Quinoline Nitroxoline as a Potent Amoebicidal Agent against the Pathogen Balamuthia mandrillaris
Source: PubMed Central journal article supplement (PMC6212833; doi:10.1128/mbio.02051-18), 2018-10-30
Supplement: mbo005184140st3.pdf [file mbo005184140st3.pdf]

**Table S3**

|                                | <i>B. mandrillaris</i> trophozoites | <i>B. mandrillaris</i> cysts  | U87 cell line                 |                 | H4 cell line                  |                 | HEK-293T cell line            |                 | HFF-1 cell line               |                 | Hep-G2 cell line              |                 | Mean of all cell lines        |                 |
|--------------------------------|-------------------------------------|-------------------------------|-------------------------------|-----------------|-------------------------------|-----------------|-------------------------------|-----------------|-------------------------------|-----------------|-------------------------------|-----------------|-------------------------------|-----------------|
|                                | IC <sub>50</sub> <sup>a</sup>       | IC <sub>50</sub> <sup>a</sup> | CC <sub>50</sub> <sup>b</sup> | SI <sup>c</sup> | CC <sub>50</sub> <sup>b</sup> | SI <sup>c</sup> | CC <sub>50</sub> <sup>b</sup> | SI <sup>c</sup> | CC <sub>50</sub> <sup>b</sup> | SI <sup>c</sup> | CC <sub>50</sub> <sup>b</sup> | SI <sup>c</sup> | CC <sub>50</sub> <sup>b</sup> | SI <sup>c</sup> |
| <b>Nitroxoline</b>             | 2.8                                 | 15.5                          | 24.9                          | 8.77            | 5.6                           | 1.96            | 4.9                           | 1.71            | 51.8                          | 18.23           | 9.3                           | 3.29            | 19.3                          | 6.79            |
| <b>Pentamidine isethionate</b> | 9.1                                 | 26.3                          | 20.7                          | 2.26            | 5.7                           | 0.63            | 4.8                           | 0.52            | 23.4                          | 1.95            | 0.7                           | 0.25            | 11.1                          | 1.12            |
| <b>Miltefosine</b>             | 63.2                                | 76.5                          | 34.7                          | 0.55            | 8.4                           | 0.15            | 68.8                          | 1.21            | 67.1                          | 1.10            | 66.1                          | 0.94            | 49.0                          | 0.79            |
| <b>Azithromycin</b>            | 244.1                               | 788.4                         | 55.0                          | 0.21            | 95.0                          | 0.39            | 119.9                         | 0.59            | 115.8                         | 0.47            | 86.4                          | 0.27            | 94.4                          | 0.39            |

<sup>a</sup>IC<sub>50</sub> = half-maximal inhibitory concentration

<sup>b</sup>CC<sub>50</sub> = half-maximal cytotoxic concentration

<sup>c</sup>Selectivity Index (SI) = (cell line CC<sub>50</sub>)/(*B. mandrillaris* trophozoite IC<sub>50</sub>)

**Table S3.** Summary of IC<sub>50</sub>, CC<sub>50</sub>, and SI values calculated from dose-response experiments. IC<sub>50</sub> and CC<sub>50</sub> values were calculated from dose-response curves generated by measuring the viability of cultured cells 72 hours after drug treatment. Cytotoxicity of compounds was measured in U87, H4, HEK-293T, HFF-1, and Hep-G2 cell lines. All experiments were performed in triplicate. SI values for each drug show the ratio of the CC<sub>50</sub> value for a given cell line to the IC<sub>50</sub> value for *B. mandrillaris* trophozoites. An SI value greater than 1 indicates that the drug inhibits *B. mandrillaris* trophozoites at lower concentrations than the human cell line used for comparison (i.e. has positive selectivity). Nitroxoline is the most potent inhibitor (lowest IC<sub>50</sub>) of both forms of *B. mandrillaris* and has the highest SI for all cell lines with a mean SI of 6.79.
